# Supplementary material
Source: publisher figshare collection journal article supplement (https://diabetesjournals.figshare.com/ndownloader/files/40578026)
Supplement: Supplementary file 1 [file 40578026]

# Supplemental Table and Figures to

## **A high-fat diet attenuates AMP-activated protein kinase $\alpha$ 1 in adipocytes to induce exosome shedding and nonalcoholic fatty liver development *in vivo***

Chenghui Yan<sup>1,2\*</sup>, Xiaoxiang Tian<sup>2</sup>, Jiayin Li<sup>2,3</sup>, Dan Liu<sup>2</sup>,  
Ding Ye<sup>1</sup>, Zhonglin Xie<sup>1</sup>, Yaling Han<sup>2\*</sup>, Ming-Hui Zou<sup>1</sup>

<sup>1</sup>Center for Molecular and Translational Medicine,  
Georgia State University, Atlanta, GA 30303;

<sup>2</sup>Cardiovascular Research Institute and Department of  
Cardiology, General Hospital of Northern Region,  
Shenyang 110016, China; <sup>3</sup>School of Life Sciences and  
Health, Northeastern University, Shenyang  
110169, China.

Supplemental Table 1

| Antibody and Chemical        | Company                   | Catalog number |
|------------------------------|---------------------------|----------------|
| Anti-CD63                    | Biosystem                 | EXOAB-CD63A-1  |
| Anti-CD81                    | Biosystem                 | EXOAB-CD81A-1  |
| Anti-AMPKa1                  | Cell Signaling Technology | #2795          |
| Anti-pAMPKa                  | Cell Signaling Technology | #2535          |
| Anti-beta-actin              | Cell Signaling Technology | #4970          |
| Anti-TSG101                  | Santa Cruz                | sc-7964        |
| Anti-CD36                    | Santa Cruz                | Sc-7309        |
| Anti-cleaved-caspase-3       | Cell Signaling Technology | #9579          |
| Anti-CCL2                    | Cell Signaling Technology | #2027          |
| Anti-IL-6                    | Cell Signaling Technology | #12153         |
| Anti-beta-tublin             | Cell Signaling Technology | #2418          |
| Anti-GAPDH                   | Cell Signaling Technology | #5174          |
| Anti-AMPKa                   | Cell Signaling Technology | #2532          |
| Anti-AMPKa2                  | Cell Signaling Technology | #2757          |
| palmitic acid                | Sigma Aldrich             | P0500          |
| high fat diet (60% kcal fat) | Research Diets            | D12492         |
| AICAR                        | Sigma Aldrich             | 06595          |
| Compound C                   | Sigma Aldrich             | C2313          |
| GW4869                       | Sigma Aldrich             | D1692          |

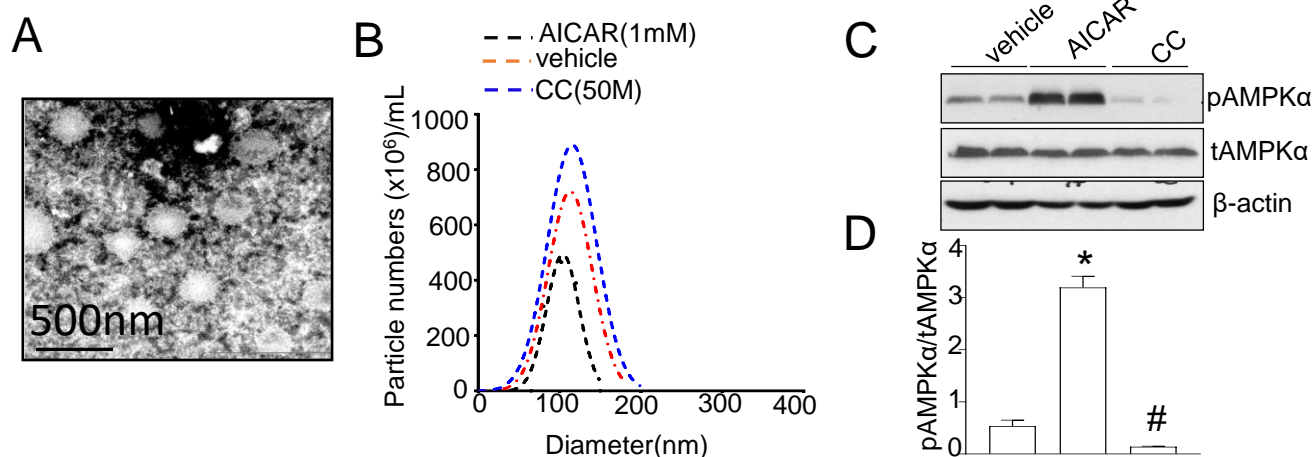

**Supplemental Figure 1. Effects of AMPK activation or inhibition on adipocyte-derived exosomes.**

**A**, Transmission electron microscope (TEM) image of adipocyte-derived exosomes. **B**, Effects of CC (50  $\mu$ M) and AICAR (1mM) on the diameter of the exosomes isolated from 3T3L1-derived adipocytes. **C**, Representative Western blots of AMPK $\alpha$  and pAMPK $\alpha$  in cellular lysates of 3T3L1-derived adipocytes treated with either CC or AICAR; the blots are a representative of three independent experiments; **D**, Quantitative data for AMPK $\alpha$  and pAMPK $\alpha$ . \* $p < 0.05$  AICAR-treated verse vehicle-treated; # $p < 0.05$  CC-treated verse vehicle-treated  $n=3$ .

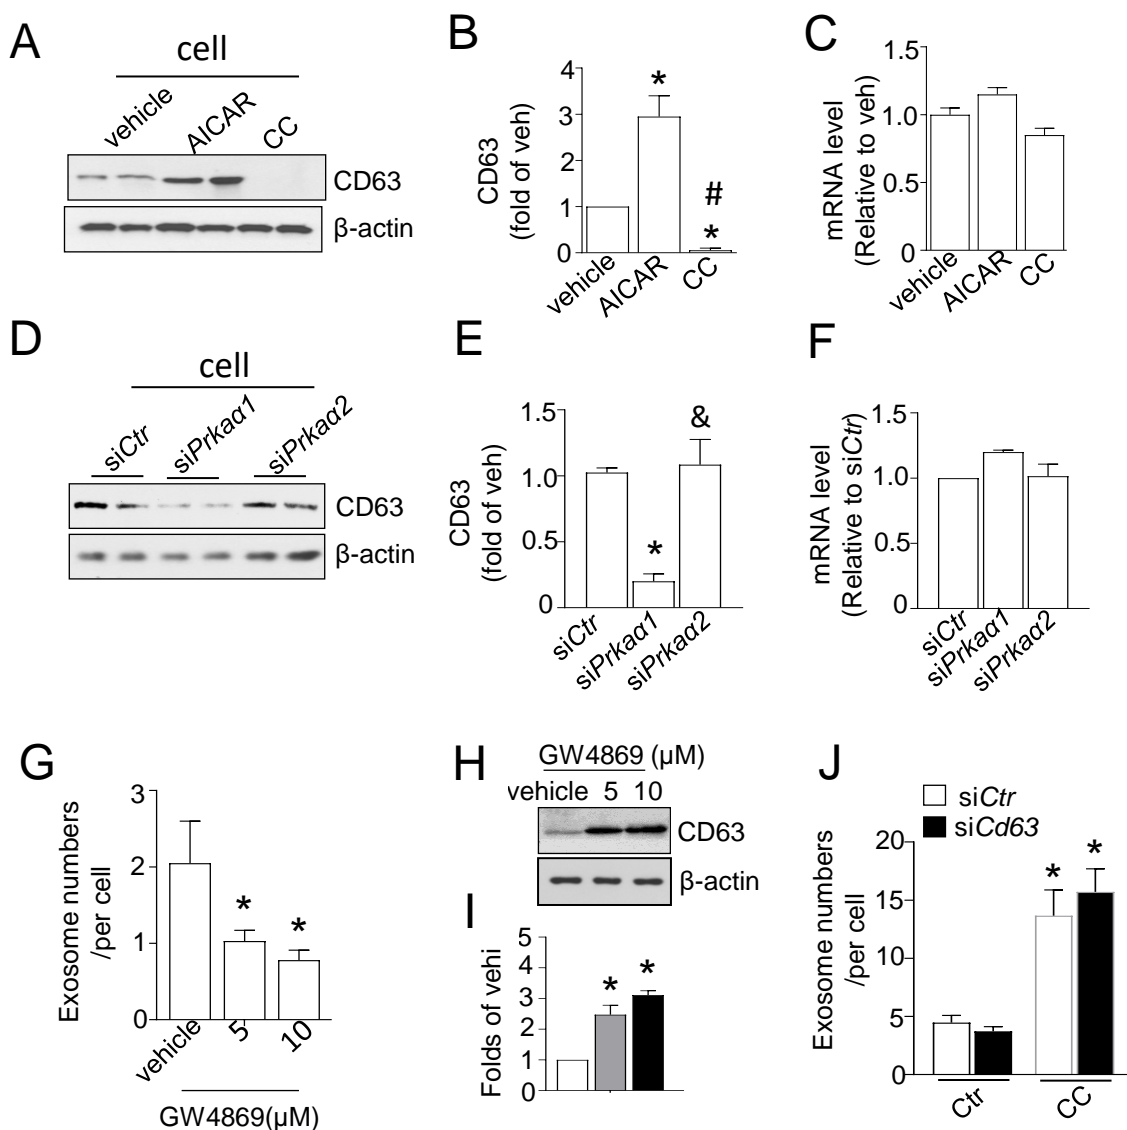

**Supplemental Figure 2. AMPK $\alpha$ 1 regulated-exosome release is independent of CD63.** **A**, Western blot analysis of CD63 in lysates of adipocytes treated with or without CC (50 nM) or AICAR (1 mM). **B**, Quantitative data for CD63. \* $p < 0.05$  vs. Vehicle.  $n=3$ . **C**, CD63 mRNA in adipocytes treated with or without CC (50 nM) or AICAR (1 mM). **D**, Western blot analysis of CD63 in lysates of adipocytes transfected with siCtrl, siPrkaa1, or siPrkaa2. **E**, Quantitative data for CD63. \* $p < 0.05$  vs. siCtrl. **F**, CD63 mRNA in adipocytes transfected with siCtrl, siPrkaa1, or siPrkaa2. **G**, Exosome number in medium from adipocytes treated with GW4869. **H**, Western blot analysis of CD63 in exosomes from 3T3L1-derived adipocytes treated with GW4869. **I**, Quantitative data for CD63. \* $p < 0.05$  vs. vehicle. **J**, Exosome number in medium from adipocytes transfected with Cd63 siRNA and treated with CC. \* $p < 0.05$  vs. control. # $p < 0.05$  vs. control group treated with AICAR treatment. & $p < 0.05$  vs. control group treated with siPrkaa1<sup>-/-</sup> or Prkaa1<sup>-/-</sup>,  $n=3$ .

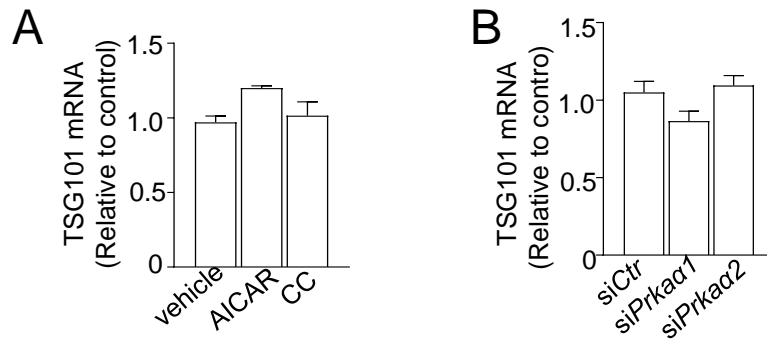

**Supplemental Figure 3. Effect of AMPK on TSG101 mRNA expression.** **A**, TSG101 mRNA level in adipocytes treated with AICAR (1 mM) or CC (50 nM). **B**. TSG101 mRNA level in adipocytes transfected with *Prkaa1* or *Prkaa2* siRNA, n=6.

**A**

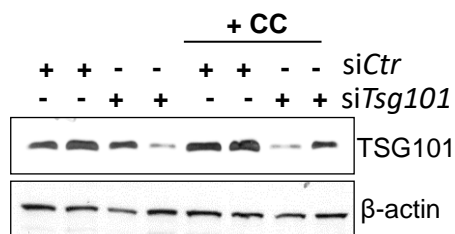

**B**

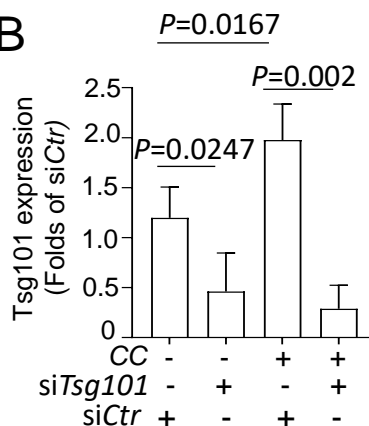

**Supplemental Figure 4. Effects of compound C (CC) on TSG101 expression in adipocytes. A,** Representative western blots of TSG101 expression in adipocytes treated with either vehicle or without CC was analyzed by western blot. **B,** Densitometric analysis of TSG101 western blots from A. \* $p < 0.05$  SiTsg101 siRNA verse control siRNA; # $p < 0.05$  Control siRNA plus verse control siRNA plus CC; \$ $p < 0.05$  control siRNA plus CC verse SiTsg101 plus CC,  $n = 3$ .

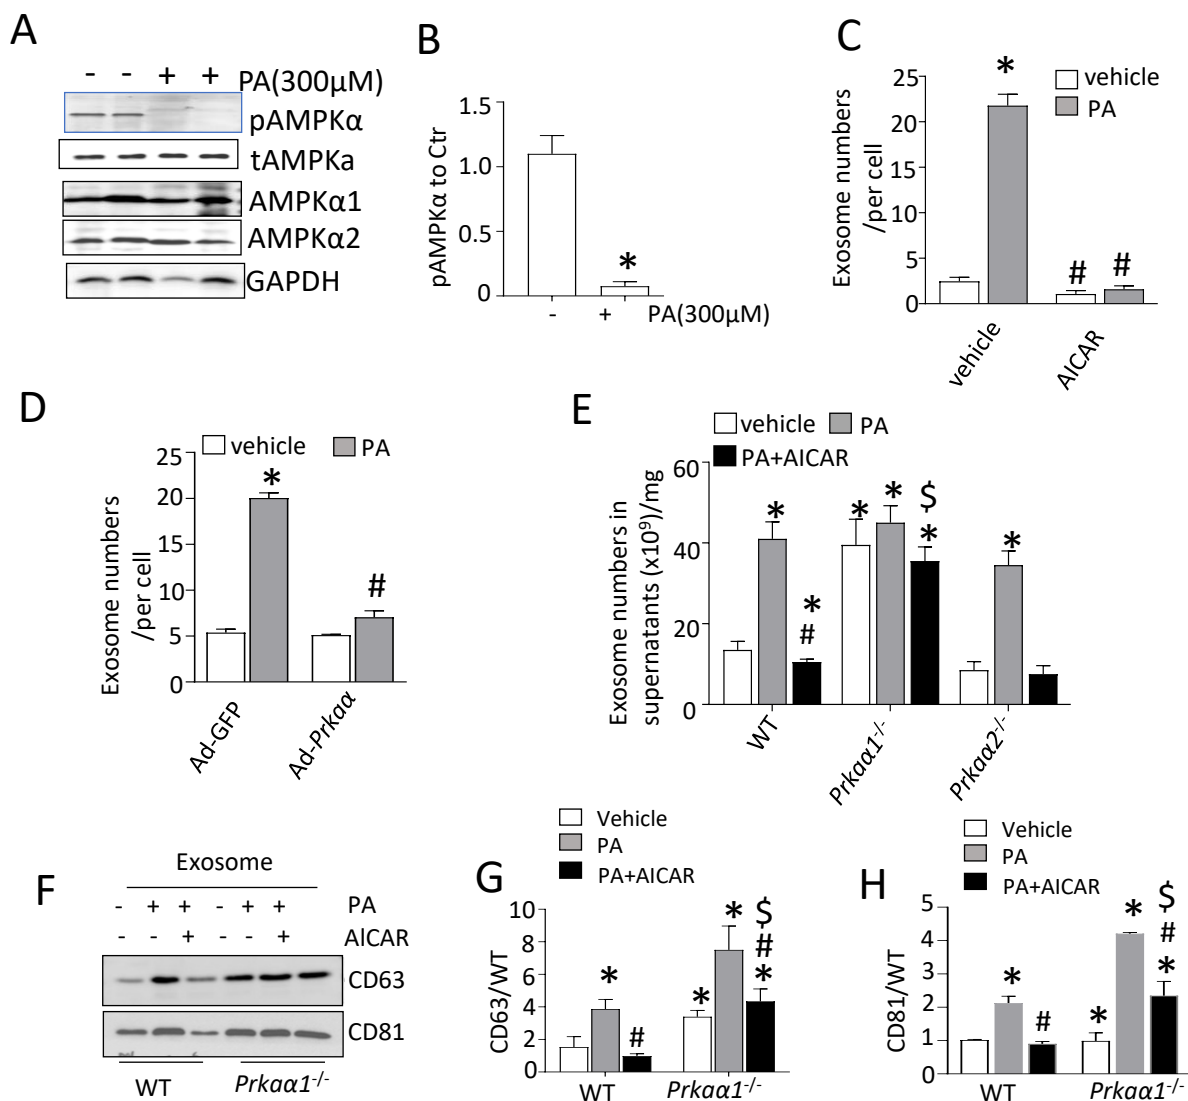

**Supplemental Figure 5. Palmitic acid (PA, 300 μM) increases exosome release by inhibiting AMPKα1.**

**A**, PA inhibits AMPK in adipocytes. Representative western blot analysis of pAMPKα, total AMPKα1(tAMPKα), AMPKα1, and AMPKα2 in 3T3L1-derived adipocytes with or without PA treatment. **B**, Quantitative analysis for pAMPKα in PA-treated adipocytes. \* $p < 0.05$  PA versus vehicle control,  $n = 3$ ; **C**, AICAR treatment suppresses PA-enhanced exosome release from adipocytes. \* $p < 0.05$  PA versus vehicle control group; # $p < 0.05$  PA versus PA plus AICAR(1mM) for 24 hours,  $n = 3$ . **D**, Effects of overexpression of adenovirus-encoding *Prkaa* or GFP on exosome numbers in PA-treated adipocytes. \* $p < 0.05$  PA versus vehicle control group; # $p < 0.05$  PA versus PA plus AICAR(1mM) for 24 hours,  $n = 3$ . **E**, Effects of AICAR in white adipose tissues (WAT) isolated from AICAR-treated WT, *Prkaa1*<sup>-/-</sup> and *Prkaa2*<sup>-/-</sup>. \* $p < 0.05$  PA versus vehicle control group; # $p < 0.05$  PA versus PA plus AICAR(1mM), The \$ $p < 0.05$  WT versus PA plus AICAR,  $n = 5$ . **F**, Representative Western blot of CD63 and CD81 in exosomes derived from PA- and AICAR-treated WT and *Prkaa1*<sup>-/-</sup> WAT. **G-H**, Quantitative data for CD63 and CD81. \* $p < 0.05$  PA versus vehicle control group; # $p < 0.05$  PA versus PA plus AICAR(1mM), \$ $p < 0.05$  WT versus PA plus AICAR,  $n = 3$ .

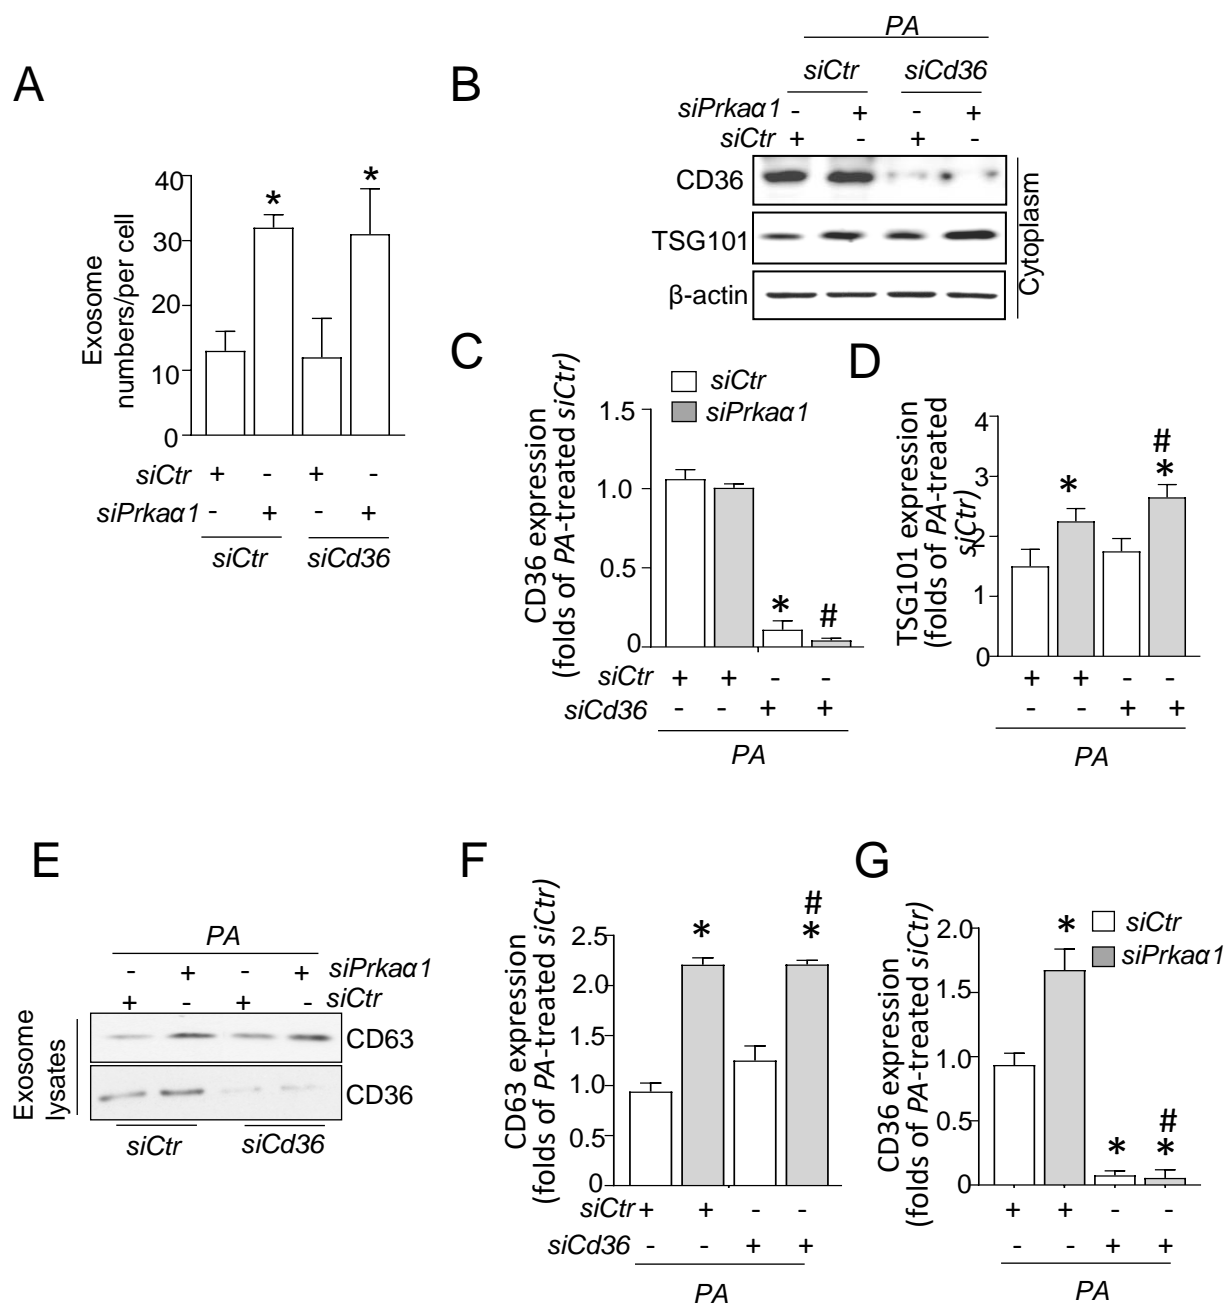

**Supplemental Figure 6. Effects of AMPK $\alpha$ 1 and CD36 on PA-induced exosome secretion.** PA-treated adipocytes were transfected with siCtrl, siPrkaa1, siCd36, and siPrkaa1+ siCd36. **A**, Exosome numbers in the media. \* $p < 0.05$  vs. siCtrl. **B**, Western blot analysis of CD36 and TSG101 in cell lysates. **C** and **D**, Quantitative data for CD36(**C**) and TSG101(**D**). \* $p < 0.05$  vs. siCtrl. # $p < 0.05$  vs. PA treated siPrkaa1 group. **E**, Western blot analysis of CD63 and CD36 in exosome lysates. **F** and **G**, Quantitative analysis of expression CD63(**F**) and CD36(**G**) in exosome from adipocytes. siCtrl: Control siRNA. \* $p < 0.05$  vs. siCtrl. # $p < 0.05$  vs. PA treated siPrkaa1 group.



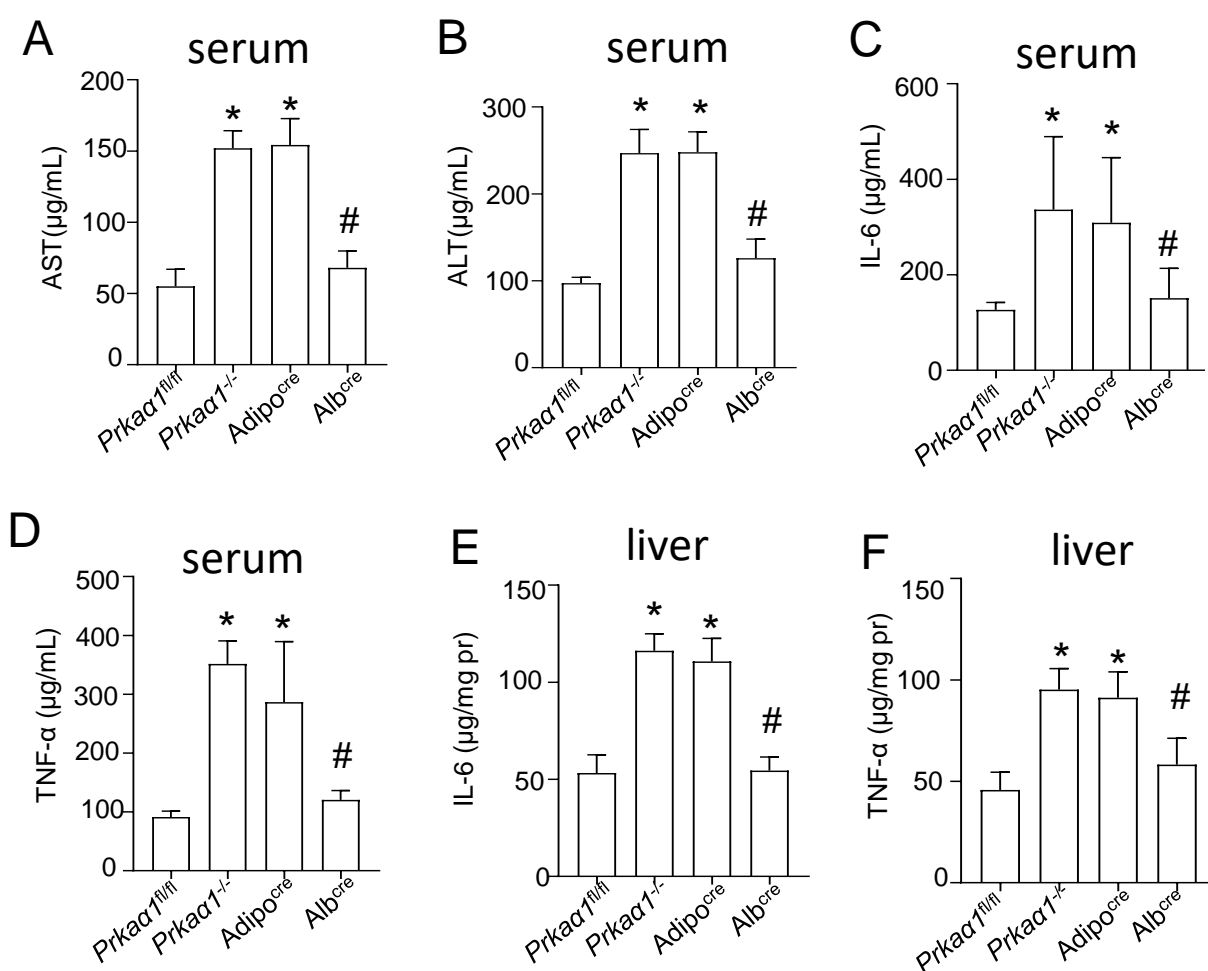

**Supplemental Figure 7. AMPKα1 deficiency exacerbates liver impairment and inflammation in the serum and liver.** *Prkaa1<sup>-/-</sup>*, *Prkaa1<sup>fl/fl</sup>*, *Adipo<sup>Cre</sup>* and *Alb<sup>Cre</sup>* mice were treated with HFD for 3 months. **A to D**, Quantification of serum AST, ALT, IL-6 and TNF-α in *Prkaa1<sup>-/-</sup>*, *Prkaa1<sup>fl/fl</sup>*, *Adipo<sup>Cre</sup>* and *Alb<sup>Cre</sup>* mice fed a HFD for 3 months (n=4 for each group). **E, F**, hepatic IL-6 and TNF-α levels. \**p* < 0.05 vs. *Prkaa1<sup>-/-</sup>* mice. #*p* < 0.05 vs. *Adipo<sup>Cre</sup>* mice

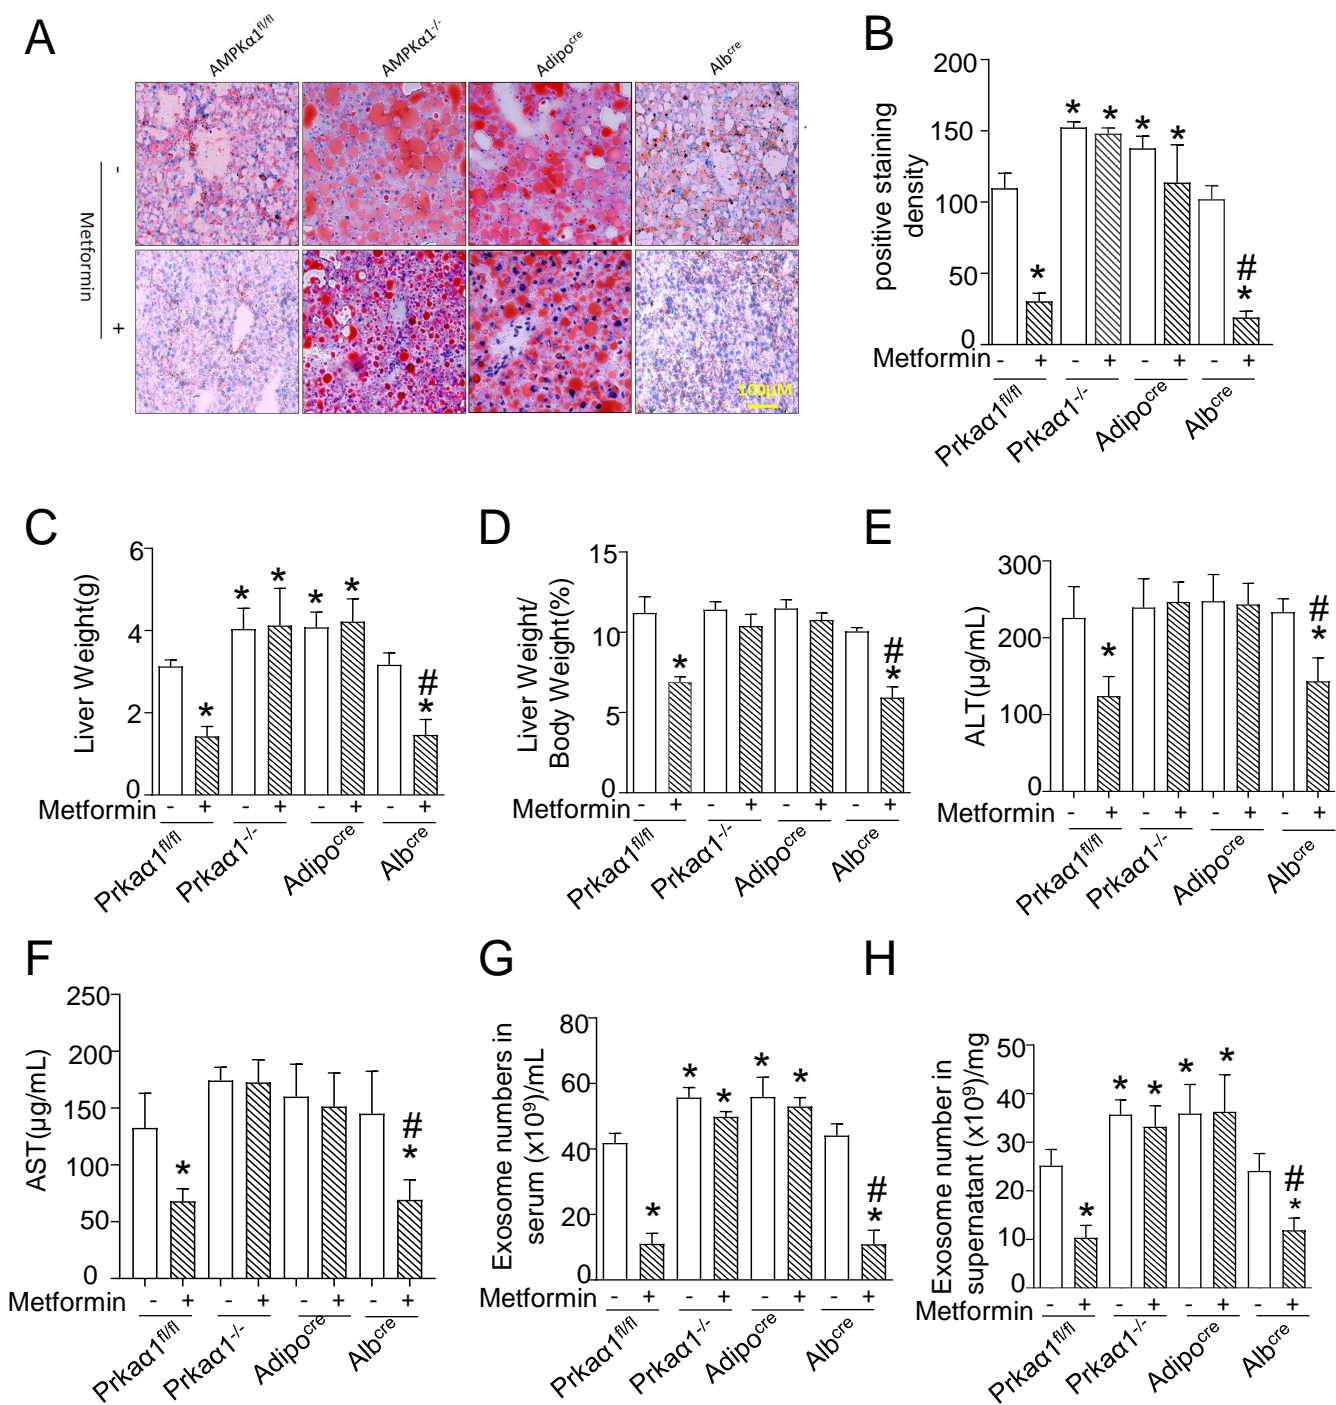

**Supplemental Figure 8. Activation of AMPK $\alpha$ 1 by metformin reduces exosome release and mitigates fatty liver only in *Prkaa1<sup>fl/fl</sup>* and *Prkaa1<sup>fl/fl</sup>:Alb<sup>Cre</sup>* mice.** *Prkaa1<sup>-/-</sup>*, *Prkaa1<sup>fl/fl</sup>*, *Adipo<sup>Cre</sup>* and *Alb<sup>Cre</sup>* mice were treated with HFD and metformin (5mg/kg/day) for 3 months. **A**, Representative images of Oil-red O staining. **B**, Quantitative data for Oil-red O staining. **C**, Liver weight. **D**, Ratio of Liver weight to Body weight. **E**, ALT. **F**, AST. **G**, Exosome number in serum. **H**, Exosome number in supernatant. (n=6). ***Adipo<sup>Cre</sup>***: *Prkaa1<sup>fl/fl</sup>:Adipo<sup>Cre</sup>* mice; ***Alb<sup>Cre</sup>***: *Prkaa1<sup>fl/fl</sup>:Alb<sup>Cre</sup>* mice. \**p* < 0.05 vs. *Prkaa1<sup>fl/fl</sup>* mice. #*p* < 0.05 vs. same group mice treated with vehicle.

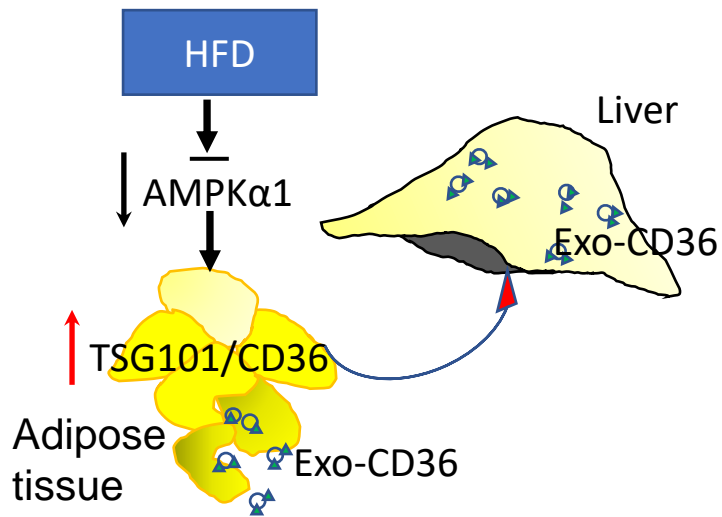

**Supplemental Figure 9:** Schematic illustration of HFD-inhibited AMPKα1 inducing fatty liver by instigating exosome release from adipose tissue in mice.
